# Supplementary material for: miR-181a involves in the hippocampus-dependent memory formation via targeting PRKAA1
Source: PubMed Central journal article supplement (PMC5559581; doi:10.1038/s41598-017-09095-3), 2017-08-16
Supplement: 41598_2017_9095_MOESM1_ESM.pdf [file 41598_2017_9095_MOESM1_ESM.pdf]

miR-181a involves in the hippocampus-dependent memory formation via  
targeting PRKAA1

Sun-fu Zhang<sup>1,2\*</sup>, Jun-chen Chen<sup>3\*</sup>, Jing Zhang<sup>1</sup>, Jian-guo Xu<sup>1#</sup>

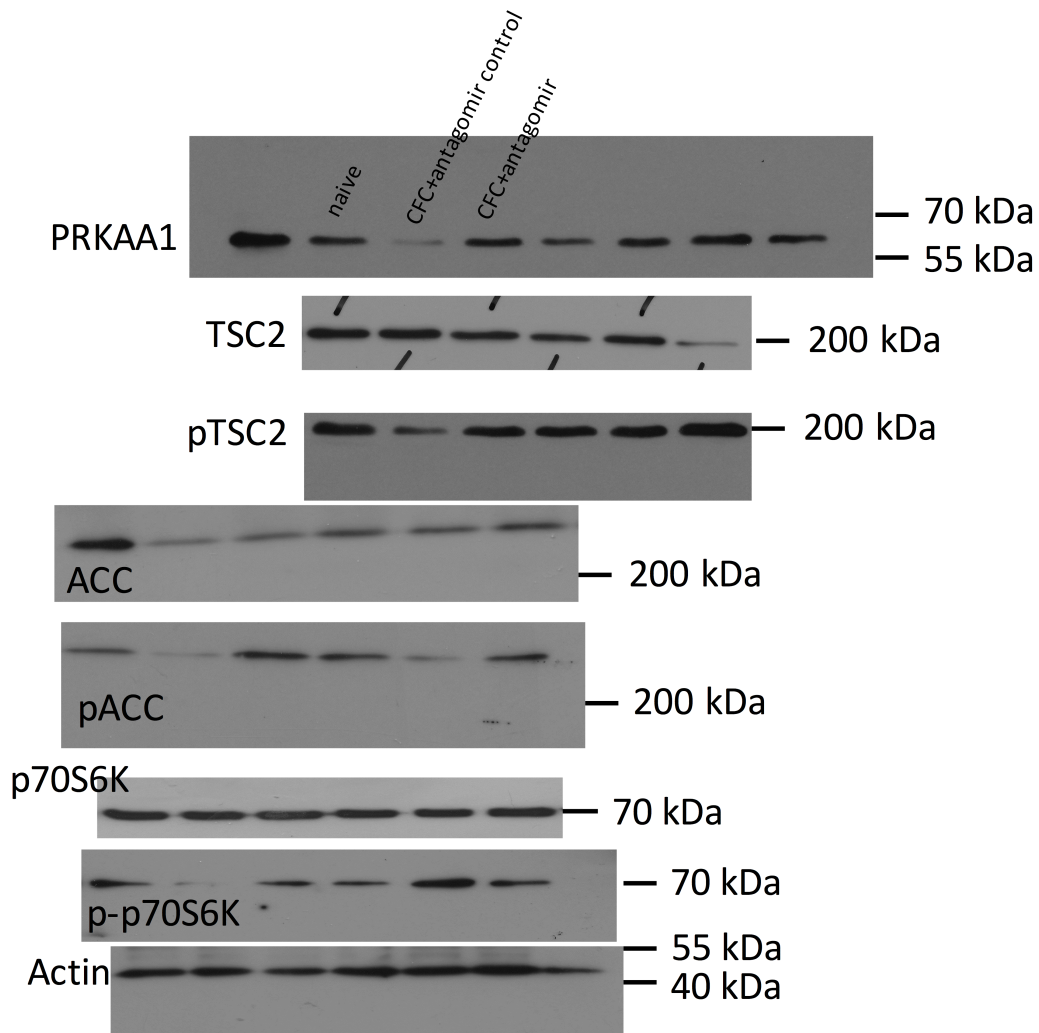

**Supplementary Figure 1.** Original uncropped Western blots of the images reported in Fig. 5a.

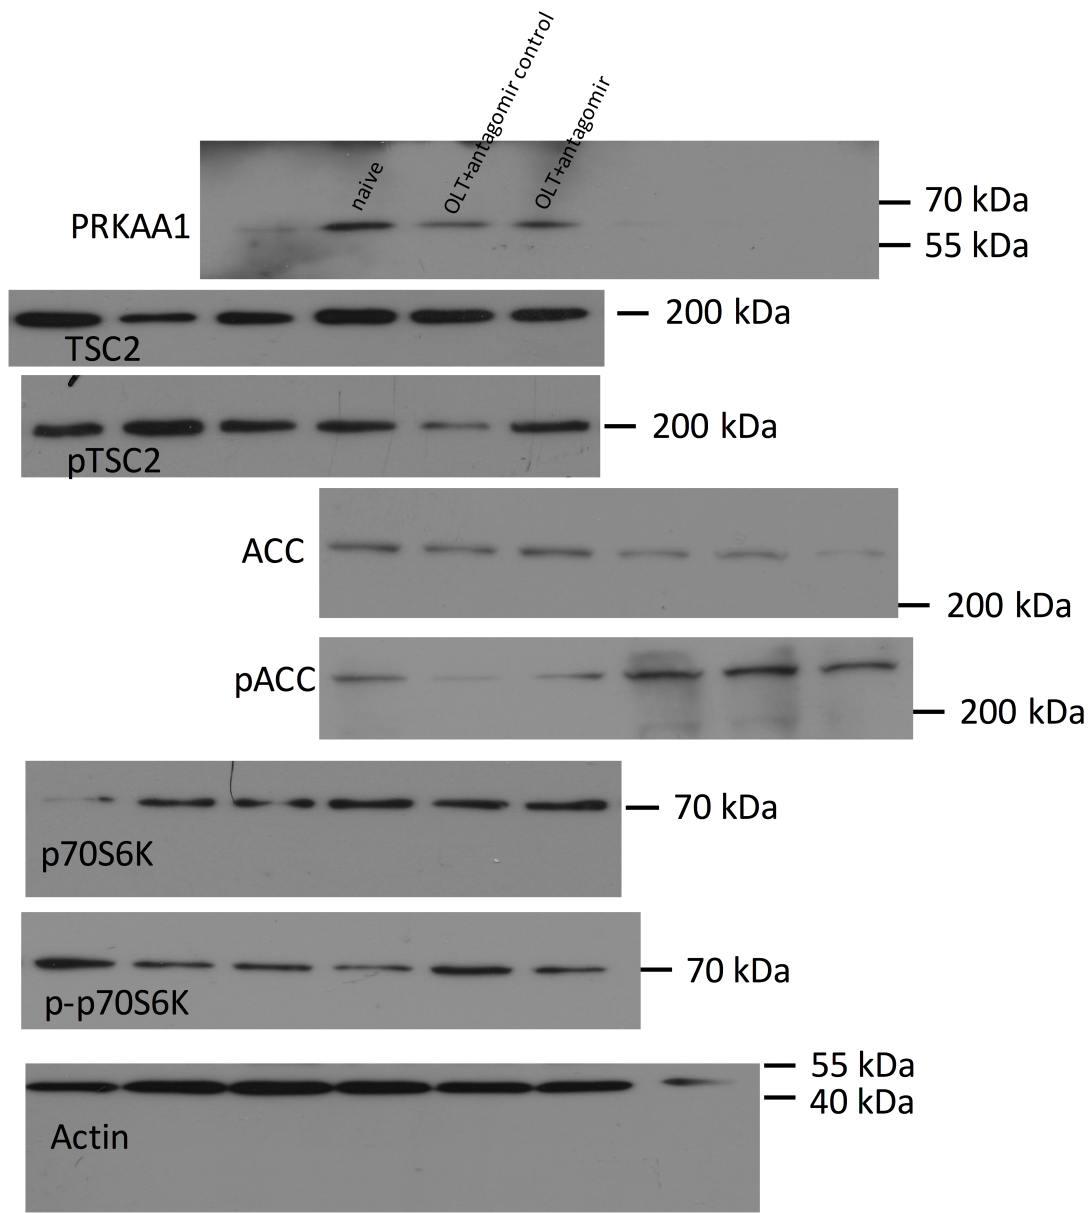

**Supplementary Figure 2.** Original uncropped Western blots of the images reported in Fig. 5f.
